# Supplementary material for: Molecular Surveillance of Dengue in Semarang, Indonesia Revealed the Circulation of an Old Genotype of Dengue Virus Serotype-1
Source: PubMed Central journal article supplement (PMC3738473; doi:10.1371/journal.pntd.0002354), 2013-08-08

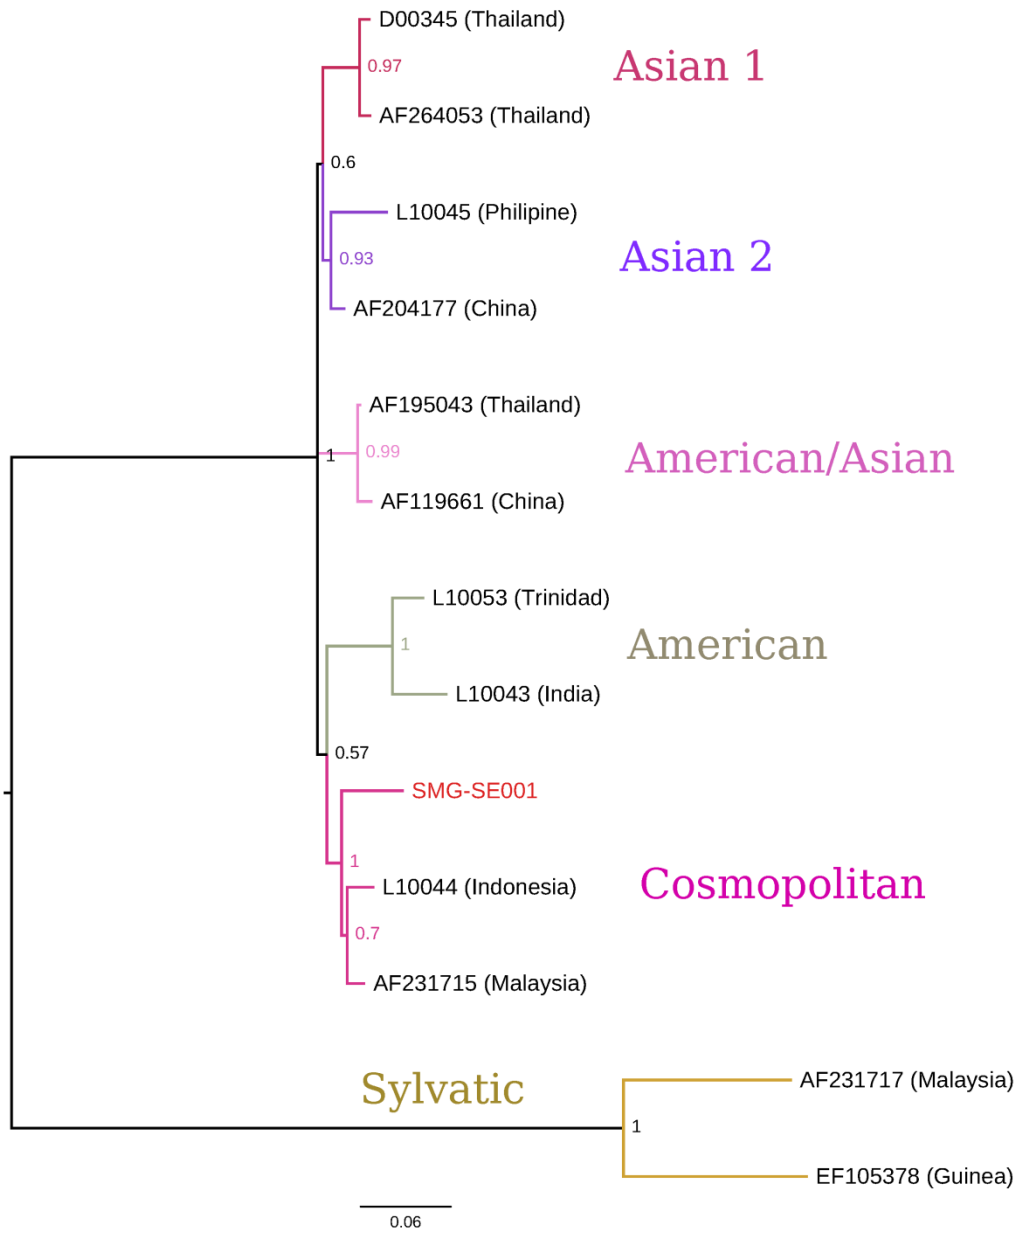

Supplement: pntd.0002354.s002.pdf [file pntd.0002354.s002.pdf]
